# Supplementary material
Source: ML conference proceedings conference paper supplement (https://openaccess.thecvf.com/content/CVPR2022/html/Cao_Iterative_Deep_Homography_CVPR_2022_paper.html)
Supplement: Supplementary file 2 [file Cao_Iterative_Deep_Homography_CVPR_2022_supplemental.zip]

Archive with 2 entries (2 files):
- 04102-supp.pdf
- 04102-demo.mp4
